# Supplementary material for: Tuberculosis and COVID-19 co-infection: description of the global cohort
Source: PubMed Central journal article supplement — Eur Respir J. 2022 Mar 24;59(3):2102538. doi: 10.1183/13993003.02538-2021 (PMC8588566; doi:10.1183/13993003.02538-2021), 2022-03-24

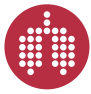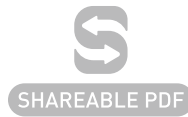

# Tuberculosis and COVID-19 co-infection: description of the global cohort

The TB/COVID-19 Global Study Group

The complete list of contributors of the TB/COVID-19 Global Study Group is provided in the Acknowledgements section

Corresponding author: Giovanni Battista Migliori ([giovannibattista.migliori@fsm.it](mailto:giovannibattista.migliori@fsm.it))

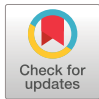

Shareable abstract (@ERSpublications)

**High mortality (11%) was observed with COVID-19/TB co-infection associated with older age, male gender and invasive ventilation. Efforts to avoid SARS-CoV-2 infection in TB patients are recommended to prevent excess morbidity and mortality.** <https://bit.ly/3mSylCK>

**Cite this article as:** The TB/COVID-19 Global Study Group. Tuberculosis and COVID-19 co-infection: description of the global cohort. *Eur Respir J* 2022; 59: 2102538 [DOI: 10.1183/13993003.02538-2021].

This single-page version can be shared freely online.

Copyright ©The authors 2022.

This version is distributed under the terms of the Creative Commons Attribution Non-Commercial Licence 4.0. For commercial reproduction rights and permissions contact [permissions@ersnet.org](mailto:permissions@ersnet.org)

This article has an editorial commentary:  
<https://doi.org/10.1183/13993003.00149-2022>

Received: 21 Sept 2021  
Accepted: 1 Nov 2021

## Abstract

**Background** Information on tuberculosis (TB) and coronavirus disease 2019 (COVID-19) is still limited. The aim of this study was to describe the features of the TB/COVID-19 co-infected individuals from a prospective, anonymised, multicountry register-based cohort with special focus on the determinants of mortality and other outcomes.

**Methods** We enrolled all patients of any age with either active TB or previous TB and COVID-19. 172 centres from 34 countries provided individual data on 767 TB-COVID-19 co-infected patients, (>50% population-based).

**Results** Of 767 patients, 553 (74.0%) out of 747 had TB before COVID-19 (including 234 out of 747 with previous TB), 71 (9.5%) out of 747 had COVID-19 first and 123 (16.5%) out of 747 had both diseases diagnosed within the same week (n=35 (4.6%) on the same day). 85 (11.08%) out of 767 patients died (41 (14.2%) out of 289 in Europe and 44 (9.2%) out of 478 outside Europe; p=0.03): 42 (49.4%) from COVID-19, 31 (36.5%) from COVID-19 and TB, one (1.2%) from TB and 11 from other causes. In the univariate analysis on mortality the following variables reached statistical significance: age, male gender, having more than one comorbidity, diabetes mellitus, cardiovascular disease, chronic respiratory disease, chronic renal disease, presence of key symptoms, invasive ventilation and hospitalisation due to COVID-19. The final multivariable logistic regression model included age, male gender and invasive ventilation as independent contributors to mortality.

**Conclusion** The data suggest that TB and COVID-19 are a “cursed duet” and need immediate attention. TB should be considered a risk factor for severe COVID disease and patients with TB should be prioritised for COVID-19 preventative efforts, including vaccination.

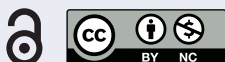

Supplement: ERJ-02538-2021.Shareable.pdf [file ERJ-02538-2021.Shareable.pdf]
